# Supplementary material for: The Campylobacter jejuni helical to coccoid transition involves changes to peptidoglycan and the ability to elicit an immune response
Source: PubMed Central journal article supplement (PMC6767375; doi:10.1111/mmi.14269), 2019-05-20
Supplement: MMI-112-280-s001.pdf [file MMI-112-280-s001.pdf]

## **Supplemental information**

**The *Campylobacter jejuni* helical to coccoid transition involves changes to peptidoglycan and the ability to elicit an immune response**

Emilisa Frirdich<sup>1\*</sup>, Jacob Biboy<sup>2</sup>, Mark Pryjma<sup>2</sup>, Joeeun Lee<sup>3</sup>, Steven Huynh<sup>4</sup>, Craig T. Parker<sup>4</sup>, Stephen E. Girardin<sup>3</sup>, Waldemar Vollmer<sup>2</sup>, and Erin C. Gaynor<sup>1\*</sup>

Running title: *C. jejuni* helical to coccoid transition

<sup>1</sup> Department of Microbiology and Immunology, University of British Columbia, Vancouver, BC, Canada

<sup>2</sup> The Centre for Bacterial Cell Biology, Institute for Cell and Molecular Biosciences, Newcastle University, Newcastle upon Tyne, United Kingdom

<sup>3</sup> Department of Laboratory Medicine and Pathobiology, University of Toronto, Toronto, ON, Canada

<sup>4</sup> Produce Safety and Microbiology Unit, Western Region Research Center, USDA, Agricultural Research Service, Albany, CA, USA

\* Address correspondence to:

Emilisa Frirdich: [emilisa@mail.ubc.ca](mailto:emilisa@mail.ubc.ca), 604-827-5796;  
or Erin C. Gaynor: [egaynor@mail.ubc.ca](mailto:egaynor@mail.ubc.ca), 604-822-6042

Key words: *Campylobacter jejuni*, cell morphology, peptidoglycan, DL carboxypeptidase, amidase

# **List of Contents**

## **Supplemental Experimental Procedures**

Strain construction (including table of bacterial strains and plasmids and table of primers used in this study)

Whole genome sequencing

## **Supplemental Tables:**

Table S1

Table S2

Table S3

Table S4A

Table S4B

Table S5

Table S6

## **Supplemental Figures:**

Figure S1. The *C. jejuni* transition of  $\Delta pgp2$  and  $\Delta pgp1\Delta pgp2$  mutant strains from a helical to coccoid form was similar to wild type.

Figure S2. Amidase multiple sequence alignment.

Figure S3. Coccoid *C. jejuni* retained their flagella.

## **References**

## Supplemental experimental procedures

### Construction of *C. jejuni* 81-176 $\Delta$ *amiA*, $\Delta$ 1284, the complemented *amiA* strain, and $\Delta$ *pgp1* *amiA*.

In order to delete the *amiA* gene, a portion of the gene was replaced by the Cm resistance cassette (*cat*). Initial attempts to replace a portion of the *C. jejuni* *amiA* gene with the non-polar *aphA3* kanamycin (Km) resistance cassette from pUC18-Km (Menard *et al.*, 1993) were unsuccessful. The *amiA* gene was PCR amplified with iProof (Biorad) from *C. jejuni* 81-176 genomic DNA using primers *amiA*-1 and *amiA*-2 (3060 bp). A polyA tag was added to the PCR product and it was ligated to a commercially available pGEM-T vector (Promega). The resulting construct pEF18 was verified by PCR analysis and sequencing. Inverse PCR was performed on pEF18 with primers *amiA*-3 and *amiA*-5 (deleting nucleotides 127-1664 of *amiA*) and the product was ligated to a *cat* cassette digested out of pRY109 (Yao *et al.*, 1993) with *Sma*I to form plasmid pEF18Cm. Correct insertion of the cassette in the same orientation as the *amiA* gene was verified by PCR with *cat*-2 and *amiA*-2 primers, as well as restriction enzyme analysis. *C. jejuni* 81-176 was naturally transformed with pEF18Cm and mutants were selected on MH-TV containing Cm. Mutants (designated  $\Delta$ *amiA*) were very slow growing and appeared after 5-7 days of growth as very small colonies. They were verified by PCR analysis with *amiA*-6 and *amiA*-7.

To verify that phenotypes seen with  $\Delta$ *amiA* were not due to polar effects on the downstream gene 1284 (CJJ81176\_1284; *mnmC*), the downstream gene was deleted. Gene 1284 was PCR amplified from 81-176 genomic DNA with primers 1284-1 and 1284-2 (2711 bp), a polyA tail was added to the PCR product and it was cloned into pGEM-T, forming construct pEF74. The pEF74 plasmid was verified by PCR analysis and sequencing. Inverse PCR was performed on pEF74 with primers 1284-3 and 1284-4 to delete nucleotides 37-1692 of the 1842 bp gene. The inverse PCR product was digested with *Dpn*I (to remove any native pEF74) and then ligated to the *Sma*I-digested *cat* cassette from pRY109 (Yao *et al.*, 1993), resulting in pEF74Cm. Correct insertion of the cassette in the same orientation as the 1284 gene was verified by PCR with *cat*-2 and 1284-2 primers, as well as restriction enzyme analysis. *C. jejuni* 81-176 was naturally transformed with pEF74Cm and mutants were selected on MH-TV containing Cm after 5-7 days of growth. Mutants (designated  $\Delta$ 1284) were verified by PCR analysis with 1284-1 and 1284-2.

For complementation of *amiA*, the *amiA* gene was PCR amplified with *amiA*-8 (*Xba*I) and *amiA*-9 (*Xba*I) from *C. jejuni* 81-176 genomic DNA, digested with *Xba*I and cloned into the similarly digested pRRK integration vector (Karlyshev & Wren, 2005). The resulting construct (pEF49F) was verified for orientation by PCR with the *amiA* gene in the same orientation as the antibiotic resistance cassette encoded by the vector, and sequenced. Plasmids were inserted into *C. jejuni* wild type 81-176 and  $\Delta$ *amiA* by natural transformation and transformants selected on the appropriate antibiotics. Single insertions into the rRNA spacer region were verified by PCR with primers ak233, ak234, ak235 (Karlyshev & Wren, 2005) and *aphA3*-2 for pRRK. Wild type phenotypes were only restored when the *amiA* gene was deleted in a wild type strain carrying the second copy of *amiA* at the rRNA locus and not in an  $\Delta$ *amiA* strain into which the *amiA* gene had been inserted. To knockout *amiA* in 81-176+*amiA*, this strain was naturally

transformed with both  $\Delta amiA$  genomic DNA and with pEF18Cm and mutants were selected on MH-TV containing Km and Cm. PCR and restriction enzyme analysis were used to verify deletion of *amiA* and the presence of *amiA* at the rRNA locus (this strain was designated  $\Delta amiA$ -c).

A double mutant in  $\Delta amiA$  and  $\Delta pgp1$  was constructed by deleting  $\Delta amiA$  in the  $\Delta pgp1$  strain. The  $\Delta pgp1$  mutant strain was transformed with both  $\Delta amiA$  genomic DNA and with pEF18Cm and mutants designated  $\Delta pgp1 \Delta amiA$  were selected on MH-TV containing Km and Cm. PCR analysis was used to verify deletion of *amiA*.

## Bacterial strains and plasmids

| Strain or Plasmid                                              | Genotype, serotype or description                                                                                                                                 | Reference or Source            |
|----------------------------------------------------------------|-------------------------------------------------------------------------------------------------------------------------------------------------------------------|--------------------------------|
| <b><i>C. jejuni</i></b>                                        |                                                                                                                                                                   |                                |
| 81-176                                                         | Wild type isolated from a diarrheic patient                                                                                                                       | (Korlath <i>et al.</i> , 1985) |
| $\Delta pgp1$                                                  | 81-176 <i>pgp1::aphA3</i> ; Km <sup>R</sup>                                                                                                                       | (Firdich <i>et al.</i> , 2012) |
| $\Delta pgp2$                                                  | 81-176 $\Delta pgp2$                                                                                                                                              | (Firdich <i>et al.</i> , 2014) |
| $\Delta pgp1\Delta pgp2$                                       | 81-176 <i>pgp1::aphA3\Delta pgp2</i>                                                                                                                              | (Firdich <i>et al.</i> , 2014) |
| $\Delta pgp1$ -c                                               | 81-176 $\Delta pgp1$ <i>rrn::pgp1</i> ; Km <sup>R</sup> Cm <sup>R</sup>                                                                                           | (Firdich <i>et al.</i> , 2012) |
| $\Delta pgp2$ -c                                               | 81-176 $\Delta pgp2$ <i>rrn::pgp2</i>                                                                                                                             | (Firdich <i>et al.</i> , 2014) |
| 81-176+ <i>pgp1</i>                                            | 81-176 <i>rrn::pgp1</i> (from pEF20); Km <sup>R</sup>                                                                                                             | (Firdich <i>et al.</i> , 2012) |
| $\Delta amiA$                                                  | 81-176 <i>amiA::cat</i> ; Cm <sup>R</sup>                                                                                                                         | This study                     |
| $\Delta 1284$                                                  | 81-176 <i>1284::aphA3</i> ; Km <sup>R</sup>                                                                                                                       | This study                     |
| $\Delta pgp1\Delta amiA$                                       | 81-176 <i>pgp1::aphA3 amiA::cat</i> ; Km <sup>R</sup> Cm <sup>R</sup>                                                                                             | This study                     |
| 81-176+ <i>amiA</i>                                            | 81-176 <i>rrn::amiA</i> (from pEF49F); Km <sup>R</sup>                                                                                                            | (Firdich <i>et al.</i> , 2012) |
| $\Delta amiA$ -c                                               | 81-176 $\Delta amiA$ <i>rrn::amiA</i> (from pEF49F); Km <sup>R</sup> Cm <sup>R</sup>                                                                              | This study                     |
| 81-176 (pRY112- <i>P<sub>atpF'</sub></i> - <i>gfp</i> )        | Wild type 81-176 strain expressing plasmid-encoded GFP from the <i>C. jejuni atpF'</i> promoter; Cm <sup>R</sup>                                                  | (Apel <i>et al.</i> , 2012)    |
| $\Delta pgp1$ (pRY112- <i>P<sub>atpF'</sub></i> - <i>gfp</i> ) | Wild type 81-176 strain expressing plasmid-encoded GFP from the <i>C. jejuni atpF'</i> promoter; Km <sup>R</sup> Cm <sup>R</sup>                                  | This study                     |
| <b><i>E. coli</i></b>                                          |                                                                                                                                                                   |                                |
| DH5 $\alpha$                                                   | F <sup>-</sup> , $\phi$ 80d <i>deoR lacZ\Delta M15 endA1 recA1 hsdR17(r<sub>K</sub>-m<sub>K</sub>+)</i> <i>supE44 thi-1 gyrA96 relA1 \Delta(lacZYA-argF)</i> U169 | Invitrogen                     |
| <b>Plasmids</b>                                                |                                                                                                                                                                   |                                |
| pGEM-T                                                         | PCR cloning vector; Ap <sup>R</sup>                                                                                                                               | Promega                        |
| pUC18-K2                                                       | Source of non-polar <i>aphA3</i> cassette; Ap <sup>R</sup> Km <sup>R</sup>                                                                                        | (Menard <i>et al.</i> , 1993)  |
| pRY109                                                         | Source of <i>cat</i> cassette; Ap <sup>R</sup> Cm <sup>R</sup>                                                                                                    | (Yao <i>et al.</i> , 1993)     |
| pRRC                                                           | <i>C. jejuni</i> rRNA spacer integration vector; Cm <sup>R</sup>                                                                                                  | (Karlyshev & Wren, 2005)       |
| pRRK                                                           | <i>C. jejuni</i> rRNA spacer integration vector; Km <sup>R</sup>                                                                                                  | J. Ketley                      |

|                                     |                                                                                                                              |                             |
|-------------------------------------|------------------------------------------------------------------------------------------------------------------------------|-----------------------------|
| pRY112- <i>P<sub>atpF</sub>-gfp</i> | C. jejuni replicating plasmid pRY112 derivative expressing GFP from the C. jejuni <i>atpF</i> ' promoter; Cm <sup>R</sup>    | (Apel <i>et al.</i> , 2012) |
| pEF18                               | pGEM-T ligated to <i>amiA</i> amplified with primers <i>amiA</i> -1 and <i>amiA</i> -2; Ap <sup>R</sup>                      | This study                  |
| pEF18Cm                             | pGEMT- <i>amiA</i> (pEF18) with the <i>amiA</i> gene disrupted with the <i>cat</i> cassette; Ap <sup>R</sup> Cm <sup>R</sup> | This study                  |
| pEF74                               | pGEM-T ligated to <i>1284</i> amplified with primers <i>1284</i> -1 and <i>1284</i> -2; Ap <sup>R</sup>                      | This study                  |
| pEF74Cm                             | pGEMT- <i>1284</i> (pEF74) with the <i>1284</i> gene disrupted with the <i>cat</i> cassette; Ap <sup>R</sup> Cm <sup>R</sup> | This study                  |
| pEF49F                              | pRRK derivative coding for <i>amiA</i> amplified with <i>amiA</i> -8 and <i>amiA</i> -9; Km <sup>R</sup>                     | This study                  |

## Primers

| Primer         | Sequence 5' to 3'                               | Restriction Site | Reference                      |
|----------------|-------------------------------------------------|------------------|--------------------------------|
| ak233          | GCAAGAGTTTTGCTTATGTTAGCAC                       |                  | (Karlyshev & Wren, 2005)       |
| ak234          | GAAATGGGCAGAGTGTATTCTCCG                        |                  | (Karlyshev & Wren, 2005)       |
| ak235          | GTGCGGATAATGTTGTTTCTG                           |                  | (Karlyshev & Wren, 2005)       |
| cat-2          | GTTTTTTGGATGAATTACAAGA                          |                  | (Firdich <i>et al.</i> , 2012) |
| aphA3-2        | CTATTTTTGACTTACTGGGGA                           |                  | (Firdich <i>et al.</i> , 2012) |
| <i>amiA</i> -1 | ATGAACAGTGCTTAGATCCAAATTATCAG                   |                  | This study                     |
| <i>amiA</i> -2 | AGAAAGTCTTGCCACTTCAAAGATT                       |                  | This study                     |
| <i>amiA</i> -3 | ATGAAATTTTACTgGTACcTCACTTTTAGAACC               | <i>KpnI</i>      | This study                     |
| <i>amiA</i> -5 | CGTAGATGGCGGTGTAAGAG                            | <i>XbaI</i>      | This study                     |
| <i>amiA</i> -6 | TGGCTTTAGTGCCTATCATTTTATCT                      |                  | This study                     |
| <i>amiA</i> -7 | CTTGATATACCCGCACCAATAATAGCTA                    |                  | This study                     |
| <i>amiA</i> -8 | ATGAACAGTGtTAGATCCAAATTATCAG                    | <i>XbaI</i>      | This study                     |
| <i>amiA</i> -9 | AGGAGTATTATcTagAAAGATTAGCTTAGC                  | <i>XbaI</i>      | This study                     |
| 1284-1         | GAGCGGATTTGTTTATTTCTATACATGC                    |                  | This study                     |
| 1284-2         | CGTTGGAGTATCACTTCTTAACAAACT                     |                  | This study                     |
| 1284-3         | GGGGTACCGGAGTATTATCCTTAAAGATTAGCTTAGCTTT<br>TTT |                  | This study                     |
| 1284-4         | GCAAGGTATTTGTGTGCATTGATAAA                      | <i>XbaI</i>      | This study                     |

|            |                           |                             |
|------------|---------------------------|-----------------------------|
| 1344-QRT-F | ATTCAAGGTGATGAGCCTGGTGGGA | This study                  |
| 1344-QRT-R | TCCCCACGCGAACGCTTGATAATG  | This study                  |
| rpoA-QRT-F | CGAGCTTGCTTTGATGAGTG      | (Apel <i>et al.</i> , 2012) |
| rpoA-QRT-R | AGTCCCCACAGGAAAACCTA      | (Apel <i>et al.</i> , 2012) |

### Whole-genome sequencing

Genomic DNA for all experiments was harvested via Wizard genomic DNA purification (Promega). Illumina libraries were prepared using the KAPA Low-Throughput Library Preparation Kit with Standard PCR Amplification Module (Kapa Biosystems, Wilmington, MA), following manufacturer's instructions except for the following changes: 750ng DNA was sheared using an M220 instrument (Covaris, Woburn, MA) in 50ul screwcap microtubes at 50 peak power, 20 duty factor, 20°C, 200 cycles per burst and 25 seconds duration. Adapter ligated fragments were size selected to 700-800bp following Illumina protocols. Standard desalting TruSeq LT and PCR Primers were ordered from Integrated DNA Technologies (Coralville, IA) and used at 0.375 µM and 0.5 µM final concentrations, respectively. PCR was reduced to 4 cycles. Libraries were quantified using the KAPA Library Quantification Kit (Kapa), except with 10 µl volume and 90 sec annealing/extension PCR, then pooled and normalized to 4 nM. Pooled libraries were re-quantified by ddPCR on a QX200 system (Bio-Rad), using the Illumina TruSeq ddPCR Library Quantification Kit and following manufacturer's protocols, except with an extended 2 min annealing/extension time. The libraries were sequenced 2x250 bp paired end v2 on a MiSeq instrument (Illumina) at 13.5 pM, following manufacturer's protocols. The MiSeq reads were reference assembled to the genome of the background strains *C. jejuni* 81-76 (NC\_008787) or NCTC 11168 (AL11116) using Geneious 9.1 reference assembler (Biomatters, Auckland, NZ).

**Table S1.** The mean percentage and standard error of helical, coccoid and cells transitioning to the coccoid form in *C. jejuni* wild type 81-176,  $\Delta pgp1$  mutant strain,  $\Delta pgp1$  complemented strain ( $\Delta pgp1$ -c) and *pgp1* overexpressing strain (81-176+*pgp1*) grown on solid media at 38 °C over 8 days (depicted graphically in Fig. 1B); *C. jejuni* wild type 81-176 grown in liquid culture at 38 °C at 4 days; and *C. jejuni* wild type 81-176 on solid media incubated at 4 °C for 29 days after an initial day of growth at 38 °C. At least three separate fields of view of approximately 200 bacteria/field of view were counted for each strain at each timepoint. Representative cells considered to be helical, coccoid or transitioning to the coccoid form are indicated by **a**, **b** or **c**, respectively in the DIC images in Fig. 1A.

|              |                           | Helical/Straight |     | Coccoid |     | Transitioning to coccoid |      |
|--------------|---------------------------|------------------|-----|---------|-----|--------------------------|------|
|              |                           | Mean             | SEM | Mean    | SEM | Mean                     | SEM  |
| <b>Day 1</b> | 81-176                    | 98.4             | 1.0 | 1.4     | 0.8 | 0.2                      | 0.2  |
|              | $\Delta pgp1$             | 100.0            | 0.0 | 0.0     | 0.0 | 0.0                      | 0.0  |
|              | $\Delta pgp1$ -c          | 98.9             | 0.9 | 0.7     | 0.5 | 0.4                      | 0.4  |
|              | 81-176 + <i>pgp1</i>      | 97.8             | 0.8 | 1.3     | 0.2 | 0.9                      | 0.6  |
|              | $\Delta amiA$             | 98.1             | 0.5 | 1.6     | 0.5 | 0.3                      | 0.0  |
|              | $\Delta amiA \Delta pgp1$ | 100.0            | 0.0 | 0.0     | 0.0 | 0.0                      | 0.0  |
| <b>Day 2</b> | 81-176                    | 95.8             | 3.6 | 3.4     | 3.4 | 0.8                      | 0.41 |
|              | $\Delta pgp2$             | 99.2             | 0.8 | 0.8     | 0.8 | 0.0                      | 0.0  |
|              | $\Delta pgp2$ -c          | 100.0            | 0.0 | 0.0     | 0.0 | 0.0                      | 0.0  |
|              | $\Delta pgp1 \Delta pgp2$ | 100.0            | 0.0 | 0.0     | 0.0 | 0.0                      | 0.0  |
|              | 81-176                    | 1.1              | 0.4 | 98.4    | 0.3 | 0.5                      | 0.3  |
|              | $\Delta pgp1$             | 45.3             | 5.9 | 49.7    | 6.4 | 5.0                      | 1.8  |
| <b>Day 3</b> | $\Delta pgp1$ -c          | 15.6             | 2.5 | 78.3    | 2.0 | 6.1                      | 0.5  |
|              | 81-176 + <i>pgp1</i>      | 4.6              | 2.0 | 94.9    | 2.3 | 0.5                      | 0.3  |
|              | 81-176                    | 1.4              | 0.3 | 97.1    | 0.6 | 1.5                      | 0.6  |
|              | $\Delta pgp2$             | 4.0              | 2.8 | 94.9    | 2.9 | 1.1                      | 0.3  |
|              | $\Delta pgp2$ -c          | 2.8              | 1.0 | 95.1    | 1.2 | 2.1                      | 0.3  |
|              | $\Delta pgp1 \Delta pgp2$ | 3.8              | 0.5 | 95.5    | 0.8 | 0.8                      | 0.4  |
| <b>Day 4</b> | 81-176                    | 1.2              | 0.6 | 97.6    | 0.8 | 1.2                      | 0.5  |
|              | $\Delta pgp1$             | 16.3             | 1.9 | 79.9    | 2.3 | 3.8                      | 0.7  |
|              | $\Delta pgp1$ -c          | 1.7              | 0.6 | 97.0    | 0.8 | 1.4                      | 0.8  |
|              | 81-176 + <i>pgp1</i>      | 4.2              | 0.3 | 95.0    | 0.7 | 0.8                      | 0.4  |
|              | 81-176                    | 2.3              | 0.7 | 96.5    | 1.2 | 1.2                      | 0.7  |
|              | $\Delta pgp2$             | 2.2              | 0.6 | 97.2    | 0.4 | 0.6                      | 0.2  |
| <b>Day 4</b> | $\Delta pgp2$ -c          | 2.3              | 0.3 | 96.3    | 0.9 | 1.4                      | 0.6  |
|              | $\Delta pgp1 \Delta pgp2$ | 3.5              | 0.8 | 96.4    | 0.7 | 0.1                      | 0.1  |
|              | 81-176                    | 1.4              | 0.7 | 97.8    | 0.6 | 0.8                      | 0.3  |
|              | $\Delta pgp1$             | 14.5             | 5.1 | 83.1    | 4.8 | 2.4                      | 1.2  |
|              | $\Delta pgp1$ -c          | 3.7              | 0.5 | 95.9    | 0.7 | 0.4                      | 0.2  |
|              | 81-176 + <i>pgp1</i>      | 2.3              | 1.2 | 95.8    | 1.3 | 1.9                      | 0.2  |
| <b>Day 4</b> | $\Delta amiA$             | 45.7             | 0.3 | 48.6    | 0.4 | 5.6                      | 0.2  |
|              | $\Delta amiA \Delta pgp1$ | 91.9             | 0.5 | 7.3     | 0.4 | 0.8                      | 0.1  |
| <b>Day 4</b> | 81-176                    | 1.3              | 0.6 | 96.3    | 0.9 | 2.5                      | 1.0  |

|               |                          |      |     |      |     |     |     |
|---------------|--------------------------|------|-----|------|-----|-----|-----|
|               | <i>Δpgp2</i>             | 1.2  | 0.2 | 98.2 | 0.3 | 0.6 | 0.4 |
|               | <i>Δpgp2-c</i>           | 0.9  | 0.3 | 96.9 | 0.8 | 2.2 | 0.8 |
|               | <i>Δpgp1Δpgp2</i>        | 2.7  | 0.6 | 95.5 | 1.4 | 1.8 | 0.8 |
|               | 81-176 (broth)           | 3.1  | 0.3 | 90.6 | 1.6 | 6.1 | 1.9 |
|               | 81-176pGFP<br>(broth)    | 3.0  | 1.8 | 92.7 | 1.8 | 4.4 | 0.1 |
| <b>Day 8</b>  | 81-176                   | 0.4  | 0.2 | 97.6 | 0.4 | 2.0 | 0.6 |
|               | <i>Δpgp1</i>             | 9.8  | 1.2 | 89.0 | 1.2 | 1.2 | 0.2 |
|               | <i>Δpgp1-c</i>           | 1.2  | 0.7 | 97.9 | 0.2 | 1.0 | 0.5 |
|               | 81-176 + <i>pgp1</i>     | 2.2  | 0.5 | 96.4 | 1.1 | 1.3 | 1.1 |
|               | <i>ΔamiA</i>             | 36.7 | 0.2 | 55.3 | 0.4 | 8.0 | 0.3 |
|               | <i>ΔamiA Δpgp1</i>       | 86.0 | 0.3 | 13.0 | 0.3 | 1.0 | 0.2 |
|               | 81-176                   | 1.1  | 0.6 | 96.4 | 1.2 | 2.5 | 0.7 |
|               | <i>Δpgp2</i>             | 1.4  | 0.6 | 96.1 | 2.6 | 2.5 | 2.0 |
|               | <i>Δpgp2-c</i>           | 0.6  | 0.2 | 97.9 | 1.3 | 1.6 | 1.3 |
|               | <i>Δpgp1Δpgp2</i>        | 1.9  | 0.2 | 97.2 | 0.5 | 1.0 | 0.3 |
| <b>Day 29</b> | 81-176<br>(grown at 4 C) | 4.3  | 0.6 | 88.7 | 1.6 | 7.0 | 1.0 |

---



**Table S2.** Genomic changes relative to the *C. jejuni* 81-176 reference sequence in GenBank (CP000538) of our laboratory strain of *C. jejuni* 81-176 (denoted 81-176 in the table; helical morphology),  $\Delta amiA$  mutant strains (EF262 and EF280; morphology consisting of helical chains of cells with growth defect) and  $\Delta amiA$  suppressor strains generated through laboratory passage (EF262-P5 and EF280-P5, both passaged 5 times, and EF188 with an unknown amount of passages; morphology consisting of shorter chains of cells and wild type growth). The *cat<sup>R</sup>* resistance cassette insertion in *amiA* is not shown.

| No. <sup>2</sup> | Locus         | Putative function                                                                                            | Nucleotide position | Change         | Codon change | Amino acid change | Polymorphism              | Protein effect | Sample <sup>1</sup> |                     |                            |                     |                            |
|------------------|---------------|--------------------------------------------------------------------------------------------------------------|---------------------|----------------|--------------|-------------------|---------------------------|----------------|---------------------|---------------------|----------------------------|---------------------|----------------------------|
|                  |               |                                                                                                              |                     |                |              |                   |                           |                | 81-176              | $\Delta amiA$ EF262 | $\Delta amiA$ -P5 EF262-P5 | $\Delta amiA$ EF280 | $\Delta amiA$ -P5 EF280-P5 |
| 1*               |               | Intergenic between hypothetical proteins CJJ81176_0082 and CJJ81176_0083                                     | 76 411              | (C)9 -> (C)10  |              |                   | Insertion (tandem repeat) |                |                     |                     | 88.9%                      | 92.9%               |                            |
| 2*               | CJJ81176_0113 | LctP; L-lactate permease                                                                                     | 99 044              | (T)7 -> (T)8   |              |                   | Insertion (tandem repeat) | Frame Shift    | 92.9%               | 85.20%              | 88.60%                     | 94.7%               | 100%                       |
| 3*               | CJJ81176_0206 | Conserved hypothetical protein                                                                               | 178 080             | C -> G         | ACC -> ACG   |                   | Insertion (tandem repeat) | Frame Shift    |                     |                     |                            | 85.0%               |                            |
| 4*               | CJJ81176_0227 | PurF; amidophosphoribosyltransferase                                                                         | 197 289             | C -> T         | AGC -> AAC   | S -> N            | SNP (transition)          | Substitution   | 100%                | 100%                | 100%                       | 100%                | 100%                       |
| 5                | CJJ81176_0716 | MraW; S-adenosyl-methyltransferase                                                                           | 646 040             | (T)5 -> (T)4   |              |                   | Deletion (tandem repeat)  | Frame Shift    | 97.4%               |                     |                            |                     |                            |
| 6                | CJJ81176_0716 | MraW; S-adenosyl-methyltransferase                                                                           | 646 114             | C -> A         |              |                   | SNP (transversion)        | Truncation     |                     |                     |                            |                     | 100%                       |
| 7*               | CJJ81176_0758 | Conserved hypothetical protein                                                                               | 685 536             | (G)9 -> (G)8   |              |                   | Deletion (tandem repeat)  | Frame Shift    |                     |                     |                            | 92.9%               |                            |
| 8                |               | Intergenic, between CJJ81176_0765 and CJJ81176_1724 (rrsC, 16S ribosomal RNA)                                | 692 439             | (CC)5 -> (CC)4 |              |                   | Deletion (tandem repeat)  |                |                     | 100%                |                            |                     |                            |
| 9*               |               | Intergenic, between CJJ81176_0765 and CJJ81176_1724 (rrsC, 16S ribosomal RNA)                                | 692 440             | (C)11 -> (C)10 |              |                   | Deletion (tandem repeat)  |                | 88.6%               | 80.0%               | 89.50%                     | 82.40%              |                            |
| 10*              |               | Intergenic between CJJ81176_0920 (CysK, cysteine synthase A) and CJJ81176_1731 (Hup, DNA-binding protein HU) | 849 698             | +T             |              |                   | Insertion                 |                | 100%                | 100%                | 95.70%                     | 100%                | 100%                       |
| 11*              |               | Intergenic between CJJ81176_0920 (CysK, cysteine synthase A) and CJJ81176_1731 (Hup, DNA-binding protein HU) | 849 704             | (T)2 -> (T)3   |              |                   | Insertion (tandem repeat) |                | 96.3%               | 96.6%               | 95.8%                      | 96.9%               | 100%                       |
| 12*              | CJJ81176_1105 | Peptidase, M23/M37 family                                                                                    | 1 021 802           | T -> C         | AGC -> GGC   | S -> G            | SNP (transition)          | Substitution   | 100%                | 100%                | 100%                       | 100%                | 100%                       |
| 13*              | CJJ81176_1160 | Beta-1,4-N-acetylgalactosaminyltransferase                                                                   | 1 079 106           | (G)10 -> (G)9  |              |                   | Deletion (tandem repeat)  | Frame Shift    | 90.9%               | 93.3%               | 93.3%                      | 100%                | 100%                       |
| 14*              | CJJ81176_1354 | Enterochelin ABC transporter, periplasmic enterochelin-binding protein                                       | 1 271 069           | A -> G         | AAT -> GAT   | N -> D            | SNP (transition)          | Substitution   | 100%                | 100%                | 100%                       | 100%                | 100%                       |
| 15               | CJJ81176_1419 | Putative methyltransferase                                                                                   | 1 341 403           | (C)9 -> (C)10  |              |                   | Insertion (tandem repeat) | Frame Shift    |                     |                     |                            | 84.6%               | 85.0%                      |

<sup>1</sup>The percentages shown represent the variant frequency. A blank cell indicates no change in that strain in comparison to the published sequence.

<sup>2</sup>An asterisk (\*) represents a mutation previously identified in our wild type 81-176 and mutant strains unrelated to  $\Delta amiA$  by whole genome sequencing and likely represent hypervariable regions in the *C. jejuni* genome (Firdich *et al.*, 2017).

**Table S3.** Legend for strain designations in Table 1, 2 and Table S4.

| Series | Date Analyzed | Strain number | Strain description        |
|--------|---------------|---------------|---------------------------|
| A      | 09/2010       | 1             | <i>Δpgp1</i> Day 1        |
|        |               | 2             | 81-176+ <i>pgp1</i> Day 1 |
| B      | 01/2011       | 1             | 81-176 Day 1              |
|        |               | 2             | 81-176 Day 4              |
|        |               | 3             | <i>Δpgp1</i> Day 4        |
|        |               | 4             | <i>Δpgp2</i> Day 1        |
| C      | 06/2011       | 1             | <i>ΔamiAΔpgp1</i> Day 1   |
| D      | 12/2011       | 1             | 81-176 Day 1              |
|        |               | 2             | <i>ΔamiA</i> Day 1        |
| E      | 01/2013       | 1             | 81-176 Day 1              |
|        |               | 2             | 81-176 4 °C Day 29        |
| F      | 08/2013       | 1             | 81-176 Day 1              |
|        |               | 2             | 81-176 Day 4              |
|        |               | 3             | <i>ΔamiA</i> Day 4        |
|        |               | 4             | 81-176+ <i>amiA</i> Day 1 |
|        |               | 5             | <i>ΔamiAΔpgp1</i> Day 4   |
| G      | 09/2014       | 1             | <i>Δpgp2</i> Day 4        |
|        |               | 2             | 81-176+ <i>pgp1</i> Day 4 |

**Table S4A.** Muropeptide composition of the wild-type 81-176,  $\Delta pgg1$ , 81-176+*pgp1* (*pgp1* overexpressing strain), and  $\Delta pgg2$  strains grown for either 1 or 4 days at 38 °C (strains were grown at 38 °C unless otherwise indicated) or 29 days at 4 °C summarized in Table 1.

|                                 |                            | <i>C. jejuni</i> strains |                 |                 |                 |                 |                       |                        |                        |                        |                        |                                  |                                  |
|---------------------------------|----------------------------|--------------------------|-----------------|-----------------|-----------------|-----------------|-----------------------|------------------------|------------------------|------------------------|------------------------|----------------------------------|----------------------------------|
|                                 |                            | 81-176<br>Day 1          | 81-176<br>Day 4 | 81-176<br>Day 1 | 81-176<br>Day 4 | 81-176<br>Day 1 | 81-176 4 °C<br>Day 29 | $\Delta pgg1$<br>Day 1 | $\Delta pgg1$<br>Day 4 | $\Delta pgg2$<br>Day 1 | $\Delta pgg2$<br>Day 4 | 81-176<br>+ <i>pgp1</i><br>Day 1 | 81-176<br>+ <i>pgp1</i><br>Day 4 |
| Strain designation <sup>1</sup> |                            | B-1                      | B-2             | F-1             | F-2             | E-1             | E-2                   | A-1                    | B-3                    | B-4                    | G-1                    | A-2                              | G-2                              |
| Peak number                     | Muropeptide species        | % Peak area              |                 |                 |                 |                 |                       |                        |                        |                        |                        |                                  |                                  |
| 1                               | Tri                        | 7.29                     | 3.59            | 8.75            | 3.77            | 5.83            | 4.86                  | 27.1                   | 31.69                  | 0.00                   | 0.00                   | 1.9                              | 0.97                             |
| 2                               | Tetra                      | 15.70                    | 11.33           | 0.41            | 0.00            | 16.10           | 15.29                 | 2.7                    | 1.28                   | 29.31                  | 18.17                  | 18.6                             | 9.03                             |
|                                 | PentaGly5                  | nd <sup>3</sup>          | nd              | 16.06           | 10.93           | 0.56            | 0.28                  | nd                     | nd                     | nd                     | 0.78                   | nd                               | 0.67                             |
| 3                               | Di                         | 13.52                    | 23.64           | 0.82            | 0.44            | 16.25           | 20.62                 | 4.2                    | 7.96                   | 8.14                   | 17.41                  | 15.4                             | 28.21                            |
| 4                               | Tri-Ac <sup>2</sup>        | 1.13                     | 0.28            | 12.96           | 23.17           | 0.32            | 0.36                  | 3.5                    | 0.18                   | 0.00                   | 0.70                   | 0.3                              | 0.28                             |
|                                 | Penta                      | nd                       | nd              | 1.01            | 0.39            | 0.00            | 0.26                  | nd                     | nd                     | nd                     | nd                     | nd                               | nd                               |
| 5                               | Tetra-Ac <sup>2</sup>      | 0.66                     | 0.00            | 0.61            | 0.00            | 0.61            | 0.81                  | 0.0                    | 0.00                   | 0.96                   | 0.00                   | 1.6                              | 0.00                             |
| 6                               | Di-Ac                      | 0.90                     | 0.30            | 0.24            | 0.66            | 0.00            | 0.22                  | 1.0                    | 0.27                   | 0.52                   | 0.00                   | 1.9                              | 0.56                             |
| 7                               | TetraTri                   | 9.70                     | 6.92            | 10.53           | 7.05            | 9.72            | 10.44                 | 20.9                   | 23.51                  | 0.00                   | 0.35                   | 2.4                              | 2.87                             |
| 8                               | TetraPentaGly5             | 0.69                     | 0.95            | 0.77            | 0.77            | 0.39            | 0.48                  | 0.7                    | 0.48                   | 0.77                   | 1.39                   | 1.8                              | 1.73                             |
| 9                               | TetraTetra                 | 20.74                    | 22.19           | 21.40           | 22.25           | 19.01           | 20.25                 | 8.7                    | 6.60                   | 32.69                  | 28.71                  | 27.8                             | 23.57                            |
|                                 | TetraPenta                 | nd                       | nd              | nd              | nd              | 0.00            | 0.24                  | nd                     | nd                     | nd                     | nd                     | nd                               | nd                               |
| 10                              | TetraTri-Ac <sup>2</sup>   | 1.94                     | 0.24            | 1.47            | 0.44            | 1.78            | 1.33                  | 4.7                    | 0.42                   | 0.00                   | 0.00                   | 0.3                              | 0.00                             |
| 11                              | TetraTetraTri              | 0.96                     | 1.09            | 0.96            | 1.01            | 0.78            | 0.77                  | 1.7                    | 2.11                   | 0.00                   | 0.39                   | 0.3                              | 0.62                             |
| 12                              | TetraTetra-Ac <sup>2</sup> | 0.31                     | 0.17            | 1.65            | 0.64            | 0.25            | 0.39                  | 1.4                    | 0.00                   | 0.43                   | 0.00                   | 4.9                              | 0.28                             |
| 13                              | TetraTetraTetra            | 4.29                     | 4.35            | 2.54            | 3.46            | 2.93            | 3.87                  | 0.6                    | 0.87                   | 5.56                   | 4.71                   | 2.4                              | 4.90                             |
| 14                              | TetraTriAnh I              | 0.89                     | 0.58            | 1.10            | 0.97            | 1.15            | 1.13                  | 2.4                    | 2.97                   | 0.00                   | 0.00                   | 0.4                              | 0.20                             |
| 15                              | TetraTriAnh II             | 2.59                     | 1.70            | 2.36            | 1.86            | 2.63            | 2.19                  | 5.0                    | 7.49                   | 0.00                   | 0.00                   | 0.3                              | 0.49                             |
| 16                              | TetraTetraAnh I            | 3.04                     | 3.68            | 2.77            | 3.16            | 3.00            | 2.88                  | 1.5                    | 1.20                   | 4.63                   | 5.32                   | 4.9                              | 3.19                             |
| 17                              | TetraTetraAnh II           | 5.26                     | 5.58            | 5.20            | 6.20            | 5.56            | 4.99                  | 1.5                    | 1.72                   | 6.96                   | 6.60                   | 4.3                              | 4.94                             |
|                                 | TetraTetraTriAnh           | nd                       | nd              | 1.13            | 1.17            | nd              | nd                    | nd                     | nd                     | nd                     | 0.00                   | nd                               | 0.80                             |
| 18                              | TetraTetraTetraAnh         | 4.63                     | 5.94            | 4.06            | 5.71            | 4.33            | 3.41                  | 1.5                    | 1.37                   | 5.52                   | 6.42                   | 4.8                              | 6.87                             |
|                                 | All known                  | 94.24                    | 92.53           | 96.80           | 94.05           | 91.20           | 95.07                 | 88.9                   | 90.12                  | 95.49                  | 90.95                  | 94.1                             | 90.18                            |

<sup>1</sup> The strain designation consists of a letter denoting the series in which the sample was analyzed followed by a number denoting the sample within the series. Samples analyzed in the same batch will have identical series letters.

<sup>2</sup> The values for the percentage of O-acetylated species do not represent the true level of O-acetylation in these strains, as most of these substitutions are lost in the standard alkaline reduction procedure used in this study to prepare the PG. These values were included to demonstrate the relative difference in O-acetylation between the samples, but actual comparisons between the samples were not made.

<sup>3</sup> nd = not determined.

**Table S4B.** Muropeptide composition of the *C. jejuni*  $\Delta amiA$ , 81-176+*amiA* (*amiA* overexpressing strain), and  $\Delta amiA\Delta ppg1$  strains grown for either 1 or 4 days at 38 °C summarized in Table 2 (the muropeptide composition of the additional strains shown in Table 2 are reported in Table S2A).

|                                 |                            | <i>C. jejuni</i> strains |                     |                          |               |                          |
|---------------------------------|----------------------------|--------------------------|---------------------|--------------------------|---------------|--------------------------|
|                                 |                            | $\Delta amiA$            | 81-176+ <i>amiA</i> | $\Delta amiA\Delta ppg1$ | $\Delta amiA$ | $\Delta amiA\Delta ppg1$ |
|                                 |                            | Day 1                    | Day 1               | Day 1                    | Day 4         | Day 4                    |
| Strain designation <sup>1</sup> |                            | D-2                      | F-4                 | C-1                      | F-3           | F-5                      |
| Peak number                     | Muropeptide species        | % Peak area              |                     |                          |               |                          |
| 1                               | Tri                        | 8.15                     | 6.98                | 21.98                    | 6.54          | 23.63                    |
| 2                               | Tetra                      | 16.29                    | 14.73               | 3.80                     | 4.97          | 0.92                     |
|                                 | PentaGly5                  | nd <sup>3</sup>          | 0.99                | nd                       | 0.00          | 0.00                     |
| 3                               | Di                         | 14.18                    | 15.39               | 8.58                     | 28.02         | 15.97                    |
| 4                               | Tri-Ac <sup>2</sup>        | 0.35                     | 1.25                | 3.10                     | 0.70          | 0.68                     |
|                                 | Penta                      | nd                       | nd                  | nd                       | nd            | nd                       |
| 5                               | Tetra-Ac <sup>2</sup>      | 0.07                     | 0.87                | 0.13                     | 0.23          | 0.00                     |
| 6                               | Di-Ac                      | 0.13                     | 1.10                | 1.56                     | 1.12          | 0.68                     |
| 7                               | TetraTri                   | 11.48                    | 9.29                | 17.87                    | 10.86         | 23.87                    |
| 8                               | TetraPentaGly5             | 0.68                     | 1.12                | 1.21                     | 0.74          | 0.47                     |
| 9                               | TetraTetra                 | 22.26                    | 20.42               | 10.25                    | 20.07         | 8.67                     |
|                                 | TetraPenta                 | nd                       | nd                  | nd                       | nd            | nd                       |
| 10                              | TetraTri-Ac <sup>2</sup>   | 0.18                     | 1.70                | 4.58                     | 1.13          | 0.90                     |
| 11                              | TetraTetraTri              | 1.10                     | 1.28                | 1.67                     | 1.16          | 2.31                     |
| 12                              | TetraTetra-Ac <sup>2</sup> | 0.08                     | 2.16                | 1.70                     | 1.49          | 0.35                     |
| 13                              | TetraTetraTetra            | 3.04                     | 2.50                | 1.03                     | 2.57          | 1.16                     |
| 14                              | TetraTriAnh I              | 1.01                     | 1.03                | 1.89                     | 1.22          | 2.63                     |
| 15                              | TetraTriAnh II             | 2.17                     | 2.43                | 3.88                     | 2.36          | 6.71                     |
| 16                              | TetraTetraAnh I            | 2.85                     | 2.72                | 1.84                     | 2.65          | 1.32                     |
| 17                              | TetraTetraAnh II           | 5.15                     | 5.38                | 1.76                     | 4.96          | 2.10                     |
|                                 | TetraTetraTriAnh           | nd                       | 1.06                | nd                       | 0.99          | 3.54                     |
| 18                              | TetraTetraTetraAnh         | 4.29                     | 4.12                | 2.23                     | 4.04          | 1.97                     |
| All known                       |                            | 93.46                    | 96.89               | 89.06                    | 95.82         | 97.88                    |

<sup>1</sup> The strain designation consists of a letter denoting the series in which the sample was analyzed followed by a number denoting the sample within the series. Samples analyzed in the same batch will have identical series letters.

<sup>2</sup> The values for the percentage of O-acetylated species do not represent the true level of O-acetylation in these strains, as most of these substitutions are lost in the standard alkaline reduction procedure used in this study to prepare the PG. These values were included to demonstrate the relative difference in O-acetylation between the samples, but actual comparisons between the samples were not made.

<sup>3</sup> nd = not determined.

**Table S5.** Comparison of the muropeptide dipeptides, tripeptides and tetrapeptides (from Tables 1 & 2) of the *C. jejuni* wild-type 81-176,  $\Delta pgp2$ , 81-176+*pgp1* (*pgp1* overexpressing strain),  $\Delta pgp1$ ,  $\Delta amiA$ , and  $\Delta amiA\Delta pgp1$  strains grown for 1 and 4 days at 38 °C with varying amounts of coccoid cells present in the population. The percent change between Day 1 and Day 4 of the muropeptides of the same strain are shown below the Day 4 values.

|                                       | <i>C. jejuni</i> strains |                    |                        |                        |                                  |                                  |                        |                                         |                        |                                                     |                                         |                                         |
|---------------------------------------|--------------------------|--------------------|------------------------|------------------------|----------------------------------|----------------------------------|------------------------|-----------------------------------------|------------------------|-----------------------------------------------------|-----------------------------------------|-----------------------------------------|
|                                       | 81-176<br>Day 1          | 81-176<br>Day 4    | $\Delta pgp2$<br>Day 1 | $\Delta pgp2$<br>Day 4 | 81-176<br>+ <i>pgp1</i><br>Day 1 | 81-176<br>+ <i>pgp1</i><br>Day 4 | $\Delta pgp1$<br>Day 1 | $\Delta pgp1$<br>Day 4                  | $\Delta amiA$<br>Day 1 | $\Delta amiA$<br>Day 4                              | $\Delta amiA$<br>$\Delta pgp1$<br>Day 1 | $\Delta amiA$<br>$\Delta pgp1$<br>Day 4 |
| <b>Shape</b>                          | Helical                  | Coccoid<br>(97.8%) | Straight               | Coccoid<br>(98.2%)     | Straight                         | Coccoid<br>(95.8%)               | Straight               | Rods &<br>coccooids<br>(83%<br>coccoid) | Helical chains         | Helical chains<br>& coccooids<br>(48.6%<br>coccoid) | Straight<br>chains                      | Straight chains<br>(7.3% coccoid)       |
| <b>Strain designation<sup>1</sup></b> | B-1                      | B-2                | B-4                    | G-1                    | A-2                              | G-2                              | A-1                    | B-3                                     | D-2                    | F-2                                                 | C-1                                     | F-5                                     |
| <b>Strain used for comparison</b>     |                          | B-1                |                        | B-4                    |                                  | A-2                              |                        | A-1                                     |                        | D-2                                                 |                                         | C-1                                     |
| <b>Muropeptide species</b>            | <b>% Peak area</b>       |                    |                        |                        |                                  |                                  |                        |                                         |                        |                                                     |                                         |                                         |
| Dipeptides (Total)                    | 15.3                     | 25.9<br>(+69.3%)   | 9.1                    | 19.1<br>(+109.9%)      | 18.4                             | 31.9<br>(+73.4%)                 | 5.9                    | 9.1<br>(+54.2%)                         | 15.3                   | 30.4<br>(+98.7%)                                    | 11.4                                    | 17.0<br>(+49.1%)                        |
| Monomeric tripeptides                 | 8.9                      | 4.2<br>(-52.8%)    | 0.0                    | 0.8<br>(+)             | 2.3                              | 1.4<br>(-39.1%)                  | 34.4                   | 35.4<br>(+2.9%)                         | 9.1                    | 7.6<br>(-16.5%)                                     | 28.2                                    | 24.8<br>(-12.1%)                        |
| Monomeric tetrapeptides               | 17.4                     | 12.2<br>(-29.9%)   | 31.7                   | 19.9<br>(-51.1%)       | 21.5                             | 10.0<br>(-53.4%)                 | 3.1                    | 1.4<br>(-54.8%)                         | 17.5                   | 5.4<br>(-69.1%)                                     | 4.4                                     | 0.9<br>(-79.5%)                         |
| Tripeptides (Total)                   | 17.3                     | 9.7<br>(-43.9%)    | 0.0                    | 1.1<br>(+)             | 4.2                              | 3.6<br>(-14.3%)                  | 53.6                   | 55.2<br>(+3.0%)                         | 17.4                   | 16.1<br>(-7.5%)                                     | 44.6                                    | 43.1<br>(-3.4%)                         |
| Tetrapeptides (Total)                 | 67.0                     | 63.9<br>(-4.6%)    | 90.5                   | 78.1<br>(-13.7%)       | 76.5                             | 61.9<br>(-19.1%)                 | 40.2                   | 35.4<br>(-11.9%)                        | 66.9                   | 52.1<br>(-22.1%)                                    | 43.3                                    | 36.1<br>(-16.6%)                        |

<sup>1</sup> The strain designation consists of a letter denoting the series in which the sample was analyzed followed by a number denoting the sample within the series. Samples analyzed in the same batch will have identical series letters.

**Table S6.** Comparison of the muropeptide dipeptides, tripeptides, tetrapeptides, and anhydropeptides of *H. pylori* 26695 and  $\Delta amiA$  strain grown for 8 h and 48 h published previously (Chaput *et al.*, 2016). The percent change between 8 h and 48 h of the muropeptides of the same strain are shown below the 48 h values.

| Muropeptide species     | <i>H. pylori</i> strains |                |               |                |
|-------------------------|--------------------------|----------------|---------------|----------------|
|                         | 26695                    | 26695          | $\Delta amiA$ | $\Delta amiA$  |
|                         | 8 h                      | 48 h           | 8 h           | 48 h           |
|                         | % Peak area              |                |               |                |
| Dipeptides (Total)      | 3.3                      | 23.3 (+606.1%) | 1.7           | 10.3 (+505.9%) |
| Monomeric tripeptides   | 16.8                     | 4.9 (-70.2%)   | 13.5          | 14.6 (+8.1%)   |
| Monomeric tetrapeptides | 5.2                      | 2.6 (-50.0%)   | 6.7           | 3.8 (-43.2%)   |
| Tripeptides (Total)     | 25.2                     | 14.1 (-44.0%)  | 19.7          | 21.8 (+10.7%)  |
| Tetrapeptides (Total)   | 41.8                     | 40.6 (-2.9%)   | 40.9          | 34.4 (-15.9%)  |
| Anhydropeptides (Total) | 13.0                     | 15.8 (+21.5%)  | 12.2          | 6.7 (-45.1%)   |

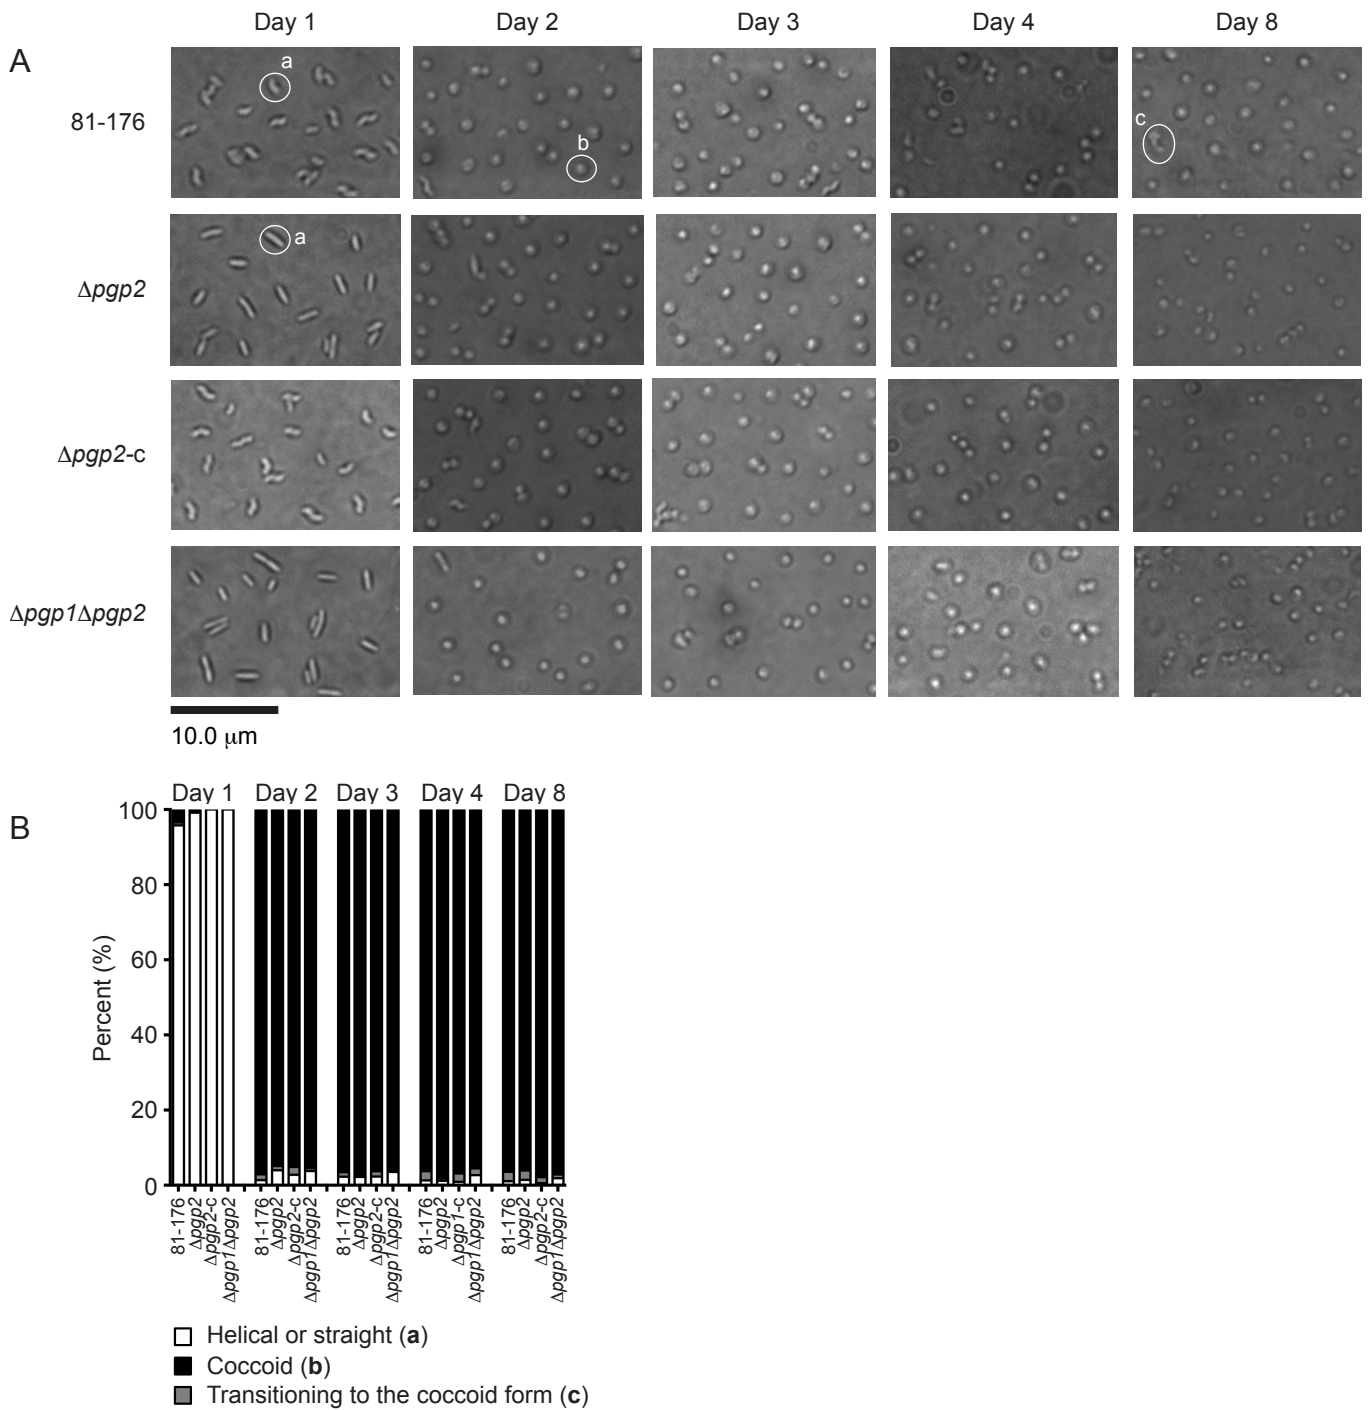

**Figure S1. The *C. jejuni* transition of  $\Delta pgp2$  and  $\Delta pgp1\Delta pgp2$  mutant strains from a helical to coccoid form was similar to wild type. **A**, DIC microscope images taken over 8 days. *C. jejuni* wild type 81-176,  $\Delta pgp2$  mutant strain,  $\Delta pgp2$  complemented strain ( $\Delta pgp2-c$ ) and  $\Delta pgp1\Delta pgp2$  double mutant strain grown on solid media at 38 °C to follow the transition to the coccoid form over time. **B**, the percentage of helical, coccoid and cells transitioning to the coccoid form as determined from DIC images such as those shown in **A**. At least three separate fields of view of approximately 200 bacteria/field of view were counted for each strain at each timepoint and this was carried out in triplicate. Representative cells considered to be helical, coccoid or transitioning to the coccoid form are indicated by **a**, **b** or **c**, respectively in the DIC images in **A**. There were no statistically significant differences in coccoid formation between wild type and  $\Delta pgp2$ ,  $\Delta pgp2-c$  or  $\Delta pgp1\Delta pgp2$  at each timepoint using the unpaired Student's t-test. No differences in growth characteristics were observed for any of the strains by growth curve analysis in liquid and on solid media (data not shown).**

|         |                                                               |     |
|---------|---------------------------------------------------------------|-----|
| CJ_AmiA | MAKIFVFLVFVFTTLFGAYENELANFDKNFIGSKSEVQVKFHHQLKSLYIQSVINEDEKT  | 60  |
| HP_AmiA | -----                                                         | 0   |
| EC_AmiB | -----                                                         | 0   |
| EC_AmiA | -----                                                         | 0   |
| EC_AmiC | -----                                                         | 0   |
|         |                                                               |     |
| CJ_AmiA | KIEILKRLI ISSNTLNLDDKSYANELKESGISEASINALRKAVVKDIKVQNIPQDAEKST | 120 |
| HP_AmiA | -----                                                         | 0   |
| EC_AmiB | -----                                                         | 0   |
| EC_AmiA | -----                                                         | 0   |
| EC_AmiC | -----                                                         | 0   |
|         |                                                               |     |
| CJ_AmiA | FEPiKTVQkNEkKSSNEQIKNTEKtNSKtSQAPKSSiVSKVKSDDKiYVLKSS-----K-  | 174 |
| HP_AmiA | -----MLVRLGVVACLFWLHYAYATTLKI                                 | 24  |
| EC_AmiB | -----MMYRIRNWLvatlllllCTP                                     | 19  |
| EC_AmiA | -----                                                         | 0   |
| EC_AmiC | -----MSGSNTAIS-----RRRLlQGAGAMWLLSVSQVSLAA                    | 32  |
|         |                                                               |     |
| CJ_AmiA | -----T-SQGVeFELNADLdKNQLKsFALDEKGNyRFISD-----FDGVLE           | 214 |
| HP_AmiA | -----TNVVPFG-SSSVKMVFNQ-----EVKKfKEVSLKNfKsYLE-----LEAILT     | 65  |
| EC_AmiB | VGAATLSDIQVSNGNQARITLSFI-----GDPDYAFSHQSKRTVALDIK---QTGVIQ    | 70  |
| EC_AmiA | -----                                                         | 0   |
| EC_AmiC | VSQ--VVAVRvWPASSYTRvTVESNRQL---KYQfALSnp--ERVvVDIEDVNLNSVLK   | 85  |
|         |                                                               |     |
| CJ_AmiA | GGKKEfKFDEY---RLViSQFNPKTIRiVvYAKEKiPiDiSFKEEKLiFSKETTSQKKT   | 270 |
| HP_AmiA | iPKKHyQfSKQ---SFITIAQfSPKLVRvViGYAPKMTyEVKiLKDKLYVSiVEKKPLiR  | 122 |
| EC_AmiB | GLPLLFSGN-NLVKAiRSgTPKDAQTLRLVVDLTENGKTEAVKRQNGS-----         | 117 |
| EC_AmiA | -----MS-TF-----                                               | 4   |
| EC_AmiC | GMAAQiRADDPfIKsARvG-QfDPQTVRMVFELKQNVKpQLfAL-----             | 128 |
|         |                                                               |     |
| CJ_AmiA | EQASKiSEKKQDQK-TEiKTKVLEtKKQDKKTnNEKENQESLYVLDVDKiSNAVVLNLSD  | 329 |
| HP_AmiA | HQMALKPPKHhALKHTTPKPAHKPiKKEAKKV-----                         | 154 |
| EC_AmiB | -----                                                         | 117 |
| EC_AmiA | -----                                                         | 4   |
| EC_AmiC | -----                                                         | 128 |
|         |                                                               |     |
| CJ_AmiA | DLDEKEiAVFDTKDQKFRyVVSfKGVLEGNrKSFTFGQNAITVtQYNPKTVR-V-----   | 382 |
| HP_AmiA | --KEKT-----PTK--HAHSKHtHSPLNERSTK-K-----                      | 179 |
| EC_AmiB | -----NYTVVF-----TiNADVPPPPPPPPVvAKRVETPAVV                    | 149 |
| EC_AmiA | -----KPLKTLtSRROVLKAGL                                        | 21  |
| EC_AmiC | -----APVAGfKER---LVMDL                                        | 142 |
|         |                                                               |     |
| :       |                                                               |     |
| CJ_AmiA | --VLSAPKEfKLLKELdNKNLTLGFYTQTTNQNASKKANQSSSKTLNTNyKSGKLvVIDA  | 440 |
| HP_AmiA | ----EiPKKEiPKKEAENESKNQVF-----IAEKNDTFiKTKRKKHKKiVLDA         | 223 |
| EC_AmiB | APRVSEPARNPfKTES-NRTTgVi---SSNT-----VTRPAARATANTGDKiIiAIDA    | 198 |
| EC_AmiA | AALTLsGM-----SQAIaKDELL-K-TSNG-----HSKPK-AKKS--GGKRvVVLDP     | 63  |
| EC_AmiC | YPANAQDMQDPLlALLEdYNKGdLE-KQVPPA-----QSGPQ-PGKAGRDRPiVIMLDP   | 194 |
|         |                                                               |     |
| .: : :* |                                                               |     |



|         |                                                                                                                       |     |
|---------|-----------------------------------------------------------------------------------------------------------------------|-----|
| CJ_AmiA | GHGGKDSGALSDKKGSLKEKDIVLSTALKLGNELKKRG--YKVLVYTRSSDKFINLRDRTKY                                                        | 499 |
| HP_AmiA | GHGGKDCGAMSAN--LVCEKDIVLEVVKFLHKELKKRD--YSVLLTRDKDIYIDLVARTEL                                                         | 280 |
| EC_AmiB | GHGGQDPGAIGPG--GTRKENVVTIAIARKLRTLNDPDMFKGVLTRDGDYFISVMGRSDV                                                          | 256 |
| EC_AmiA | GHGGIDTGAIGRN--GSKEKHVVLAIAKNVRSILRNHG--IDARLTRSGDTFIFLYDRVEI                                                         | 120 |
| EC_AmiC | GHGGEDSGAVGKY--KTRKDVVLQIARRLRSLIEKEGNMKVYMRNEDIFIFLQVRVAK                                                            | 252 |
|         | **** * **:.                    **...: . : . :..                    . ** . * : * : *                                   |     |
|         |                                                                                                                       |     |
| CJ_AmiA | ANDKRADLFISIHANAAPNATKAKSSEGVETFFLSPA--RSERSKKAEEKENQGDFEEI-                                                          | 556 |
| HP_AmiA | ANKKSADLFISVHANSIPKHST-SNAHGIETYFLSTA--RSERARKVAEQENKDDVNLN-                                                          | 336 |
| EC_AmiB | ARKQANFLVSIHADAAPNRSA----TGASVWVLSNRRANSEMASWLEQHEKQSELLGGA                                                           | 312 |
| EC_AmiA | AHKHGADLFMSIHADGFTNPKA----AGASVFALSNRGASSAMAKYLSERENRADEVAGK                                                          | 176 |
| EC_AmiC | AQKQRADLFVSIHADAFSTRQP----SGSSVFALSTKGATSTAAYLAQTQNASDLIGG-                                                           | 307 |
|         | *...: *:::***:***.                    .                    * ...: **                    * :                    : :: : |     |
|         |                                                                                                                       |     |
| CJ_AmiA | -----NYFSKQSILNFLNREKIVASNKLAI DVQKNILTQTRKKYK-IVDGGVREAP                                                             | 606 |
| HP_AmiA | -----DYFSKSLFLNSLNTQRLIVSNKLAI DVQYGMQLQSVRKNYPDVVDGGVREGP                                                            | 387 |
| EC_AmiB | GDVLANSQSDPYLSQAVLDLQFGHSQ----RVGYDVATSMISQLQR-IGEIHKRRPEHAS                                                          | 367 |
| EC_AmiA | KA----TDKDHLQVLFDFLVQTDTI----KNSLTGSHILKKIKP-VHKLHSRNTAQAA                                                            | 227 |
| EC_AmiC | VS----KSGDRYVDHTMFDMVQSLTI----ADSLKFGKAVLNKLGK-INKLHKNQVEQAG                                                          | 358 |
|         | : . . :::                    . . . ::: .                    : . . . .                                                 |     |
|         |                                                                                                                       |     |
| CJ_AmiA | FWVLVGAQMPAILIEIGYITHPNEGKRIANKAFQDLLVKGIADGVE SYFYNNR-----                                                           | 659 |
| HP_AmiA | FWVLGALMPSILIEIGYN SHAIESKRIQSKPYQKILAKGIADGID SFFSKND-----                                                           | 440 |
| EC_AmiB | LGVLRSPDIPSVLVE TGFISNNSEERLLASDDYQQQLAEAIYKGLRNYFLAHPMQSAPQG                                                         | 427 |
| EC_AmiA | FVVLKSPSPSVLVE TFSFITNPEERLLGTAAFRQKIATAIAEGVISYFHWFDNQKAHSK                                                          | 287 |
| EC_AmiC | FAVLKAPDIPSVLVE TAFISNVEERKLKTATFQQEVAESILAGIKAYFADGATLARRG-                                                          | 417 |
|         | : ** . :*::**:* .: :: * : : . :.. :. .* * : :*                                                                        |     |
|         |                                                                                                                       |     |
| CJ_AmiA | -----                                                                                                                 | 659 |
| HP_AmiA | -----                                                                                                                 | 440 |
| EC_AmiB | ATAQTASTVTTTPDRTLPN                                                                                                   | 445 |
| EC_AmiA | KR-----                                                                                                               | 289 |
| EC_AmiC | -----                                                                                                                 | 417 |

**Figure S2. Amidase multiple sequence alignment.** Clustal Omega 2.1 multiple sequence alignment of *C. jejuni* AmiA (designated CJ\_AmiA; WP\_011812778.1; 659 amino acids) with the *H. pylori* AmiA (HP\_AmiA; YP\_006934687.1; 440 amino acids), and *E. coli* K-12 AmiA (EC\_AmiA; YP\_490671.1; 289 amino acids), AmiB (EC\_AmiB; YP\_492311.1; 445 amino acids) and AmiC (EC\_AmiC; YP\_491022.1; 417 amino acids). AMIN domain (Amidase N-terminal domain; pfam11741) residues are indicated in green. This domain is suggested to mediate the periplasmic or extracellular targeting of bacterial proteins to the cell envelope. Residues marked in blue indicate the highly conserved Amidase\_3 (pfam01520) domain. This domain is found in N-acetylmuramoyl-L-alanine amidases and is involved in cleaving the amide bond between N-acetylmuramoyl and L-amino acids in bacterial PG. Residues highlighted in red are the active site residues, with the first 3 of the 4 site residues predicted to be involved in metal binding. The active site residues are highly conserved in *C. jejuni* and *H. pylori* homologs. Conserved domains and active site residues were identified with NCBI conserved domain searches.

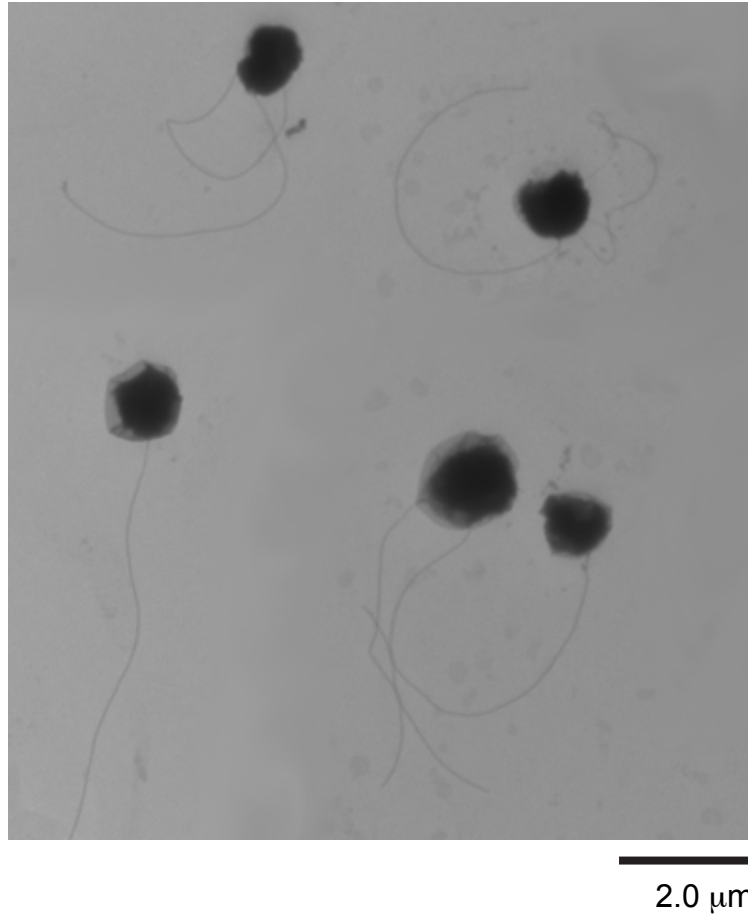

**Figure S3. Coccoid *C. jejuni* retain their flagella.** Negatively stained TEM images of coccoid *C. jejuni* 81-176 wild-type strain grown on plates for 48 h demonstrating the presence of flagella.

## References

- Apel, D., J. Ellermeier, M. Pryjma, V.J. Dirita & E.C. Gaynor, (2012) Characterization of *Campylobacter jejuni* RacRS reveals roles in the heat shock response, motility, and maintenance of cell length homogeneity. *J Bacteriol* **194**: 2342-2354.
- Chaput, C., C. Ecobichon, N. Pouradier, J.C. Rousselle, A. Namane & I.G. Boneca, (2016) Role of the N-Acetylmuramoyl-L-Alanyl Amidase, AmiA, of *Helicobacter pylori* in Peptidoglycan Metabolism, Daughter Cell Separation, and Virulence. *Microb Drug Resist* **22**: 477-486.
- Firdich, E., J. Biboy, C. Adams, J. Lee, J. Ellermeier, L.D. Gielda, V.J. Dirita, S.E. Girardin, W. Vollmer & E.C. Gaynor, (2012) Peptidoglycan-modifying enzyme Pgp1 is required for helical cell shape and pathogenicity traits in *Campylobacter jejuni*. *PLoS Pathog* **8**: e1002602.
- Firdich, E., J. Biboy, S. Huynh, C.T. Parker, W. Vollmer & E.C. Gaynor, (2017) Morphology heterogeneity within a *Campylobacter jejuni* helical population: the use of calcofluor white to generate rod-shaped *C. jejuni* 81-176 clones and the genetic determinants responsible for differences in morphology within 11168 strains. *Mol Microbiol* **104**: 948-971.
- Firdich, E., J. Vermeulen, J. Biboy, F. Soares, M.E. Taveirne, J.G. Johnson, V.J. DiRita, S.E. Girardin, W. Vollmer & E.C. Gaynor, (2014) Peptidoglycan LD-carboxypeptidase Pgp2 influences *Campylobacter jejuni* helical cell shape and pathogenic properties and provides the substrate for the DL-carboxypeptidase Pgp1. *J Biol Chem* **289**: 8007-8018.
- Karlyshev, A.V. & B.W. Wren, (2005) Development and application of an insertional system for gene delivery and expression in *Campylobacter jejuni*. *Appl Environ Microbiol* **71**: 4004-4013.
- Korlath, J.A., M.T. Osterholm, L.A. Judy, J.C. Forfang & R.A. Robinson, (1985) A point-source outbreak of campylobacteriosis associated with consumption of raw milk. *J Infect Dis* **152**: 592-596.
- Menard, R., P.J. Sansonetti & C. Parsot, (1993) Nonpolar mutagenesis of the ipa genes defines IpaB, IpaC, and IpaD as effectors of *Shigella flexneri* entry into epithelial cells. *J Bacteriol* **175**: 5899-5906.
- Yao, R., R.A. Alm, T.J. Trust & P. Guerry, (1993) Construction of new *Campylobacter* cloning vectors and a new mutational cat cassette. *Gene* **130**: 127-130.
